# Supplementary material for: Fluorescent phenylethynylene calix[4]arenes for sensing TNT in aqueous media and vapor phase
Source: Royal Society of Chemistry journal article supplement (doi:10.1039/c5ra02758f), 2015-01-01

## Supporting Information

### Fluorescent phenylethynylene Calix[4]arenes for sensing TNT in aqueous media and vapor phase

Kanokthorn Boonkitpatarakul,<sup>a</sup> Yamonporn Yodta,<sup>b</sup> Nakorn Niamnont,<sup>c</sup> Mongkol Sukwattanasinitt<sup>\*,b</sup>

<sup>a</sup> Program of Petrochemistry, Faculty of Science, Chulalongkorn University, Bangkok 10300, Thailand

<sup>b</sup> Department of Chemistry, Faculty of Science, Chulalongkorn University, Bangkok 10300, Thailand

<sup>c</sup> Department of Chemistry, Faculty of Science, King Mongkut's University of Technology Thonburi, Bangkok 10140, Thailand

[msukwatt@gmail.com](mailto:msukwatt@gmail.com)

|                                                                                                                                               | Page |
|-----------------------------------------------------------------------------------------------------------------------------------------------|------|
| <b>Table S1</b> Photophysical and HOMO, LUMO data                                                                                             | S2   |
| <b>Fig S1</b> HOMO and LUMO energy levels calculated for <b>BAC</b> , <b>SAC</b> , <b>ANC</b> , and explosive analytes i.e. DNT, TNT, and PA. | S2   |
| <b>Fig. S2</b> Cyclic voltammogram of ferrocene, ANC, SAC, and BAC in DMF used for determination of HOMO and LUMO.                            | S3   |
| <b>Fig. S3</b> Fluorescence responses of ANC to DNT and PA.                                                                                   | S4   |
| <b>Fig. S4</b> Stern-Volmer plots for fluorescence quenching of ANC with TNT, DNT and PA.                                                     | S4   |
| <b>Fig. S5</b> Fluorescence intensity of ANC 0.5 $\mu$ M at $\lambda_{\text{max}} = 420$ nm in various pH.                                    | S4   |
| <b>Fig. S6.</b> Job's plot of fluorescence responses of <b>ANC</b> upon addition of TNT showing 1:1 stoichiometry.                            | S5   |
| <b>Fig. S7.</b> Fluorescence quenching of ANC for TNT 100 equiv in DMF and 1%THF/H <sub>2</sub> O.                                            | S5   |
| <b>Fig. S8</b> Impression of a glove-wearing thumb after rubbing with various nitroaromatic compounds.                                        | S5   |
| <b>Table S2</b> Fluorescence quenching effects of TNT and PA found in this work in comparison with previously reported literature works       | S6   |
| NMR Spectra                                                                                                                                   | S7   |

**Table S1** Photophysical and HOMO, LUMO data.

| Compound   | Absorption            |                 | Fluorescence          |            | HOMO<br>(eV) | LUMO<br>(eV) |
|------------|-----------------------|-----------------|-----------------------|------------|--------------|--------------|
|            | $\lambda_{\max}$ (nm) | $\log \epsilon$ | $\lambda_{\max}$ (nm) | $\Phi$ (%) |              |              |
| <b>BAC</b> | 310                   | 4.98            | 433                   | 10.0       | -5.64        | -2.18        |
| <b>SAC</b> | 314                   | 4.98            | 433                   | 5.0        | -5.03        | -1.56        |
| <b>ANC</b> | 315                   | 5.08            | 421                   | 7.0        | -4.84        | -1.54        |

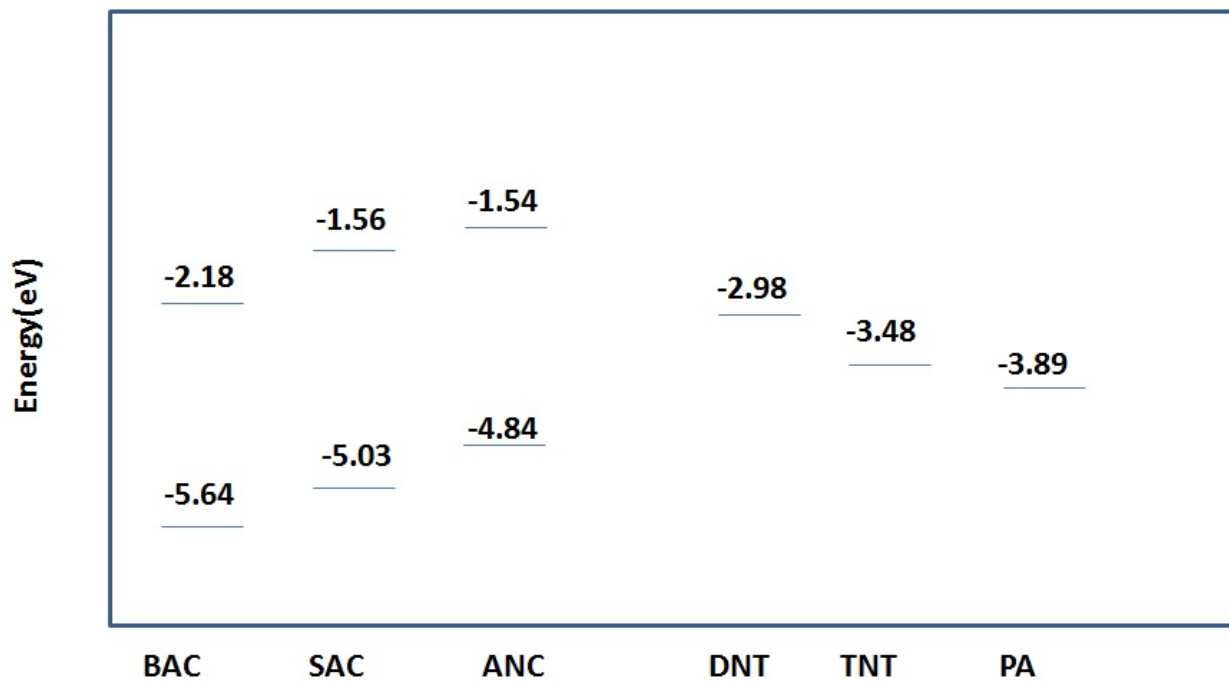

**Fig S1** HOMO and LUMO energy levels calculated for **BAC**, **SAC**, **ANC**, and some explosive analytes such as DNT, TNT, and PA.

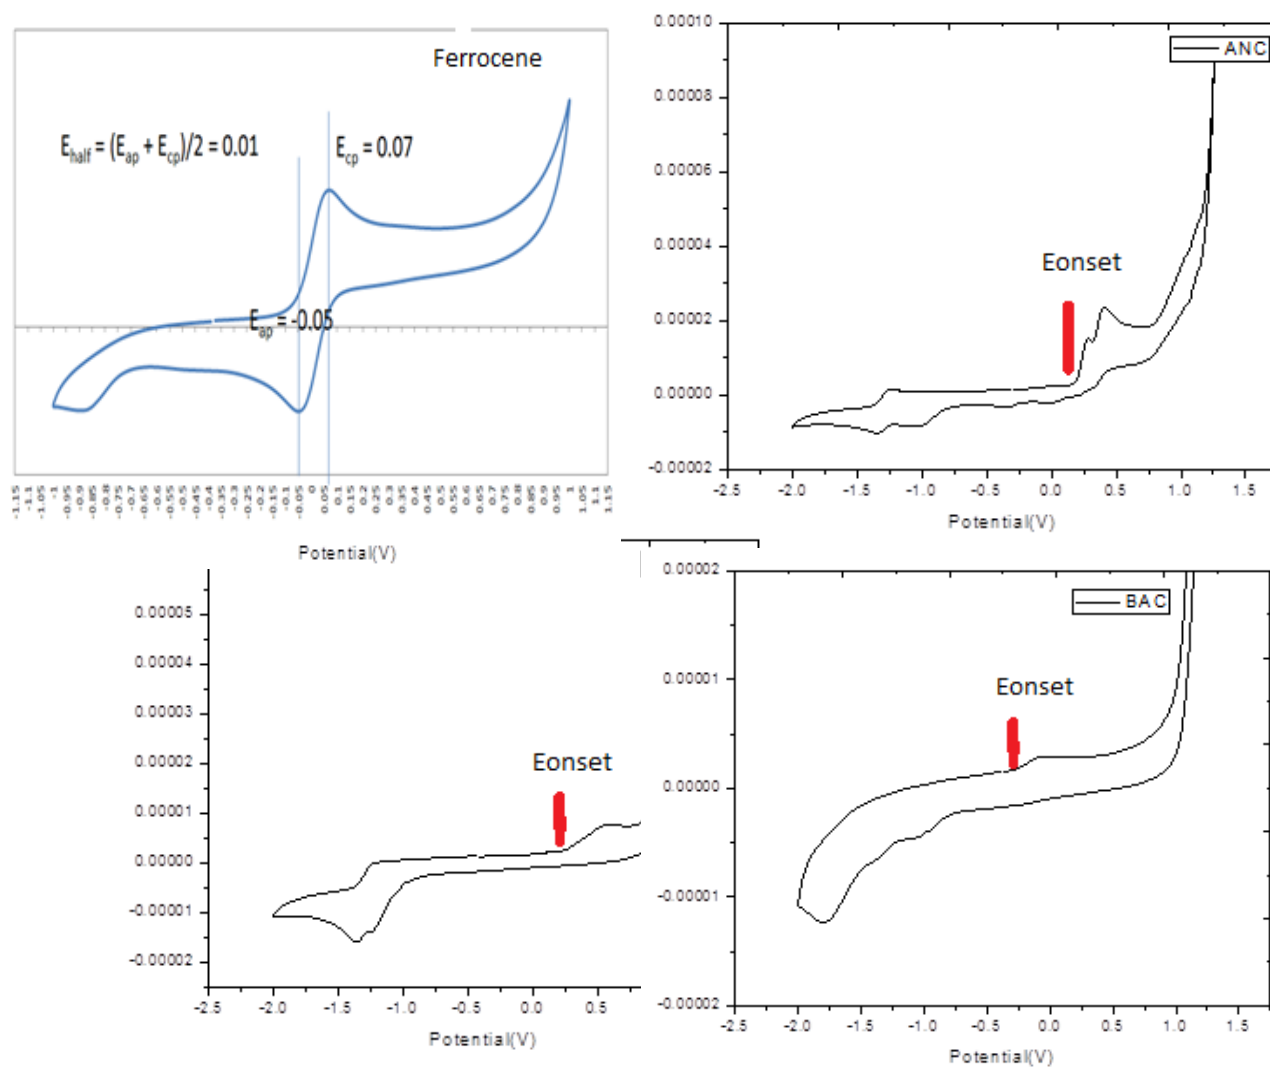

**Fig. S2** Cyclic voltammogram of ferrocene, ANC, SAC, and BAC in DMF used for determination of HOMO and LUMO.

$$E_{\text{HOMO}} = -(E(\text{ox})_{\text{onset}} - E_{\text{half}} + 4.8)^a$$

$E(\text{ox})_{\text{onset}}$  is the onset oxidation potential

$E_{\text{gap}} = 1242/\lambda_{\text{cut off}}$  where  $\lambda_{\text{cut off}}$  is the longest wavelength which give minimum absorption

$$E_{\text{LUMO}} = E_{\text{HOMO}} + E_{\text{gap}}$$

- (a) Deng, P.; Liu, L.; Ren, S.; Li, H.; Zhang, Q. *Chem. Commun.*, **2012**, 48, 6960.;(2) Tsai, J.-H.; Lee, W.-Y.; Chen, W.-C.; Yu, C.-Y.; Hwang, G.-W.; Ting, C. *Chem. Mater.*, **2010**, 22, 3290; (c) Lu, C.; Wu, H. C.; Chiu, Y. C.; Lee, W. Y.; Chen, W. C. *Macromolecules*, **2012**, 45, 3047.

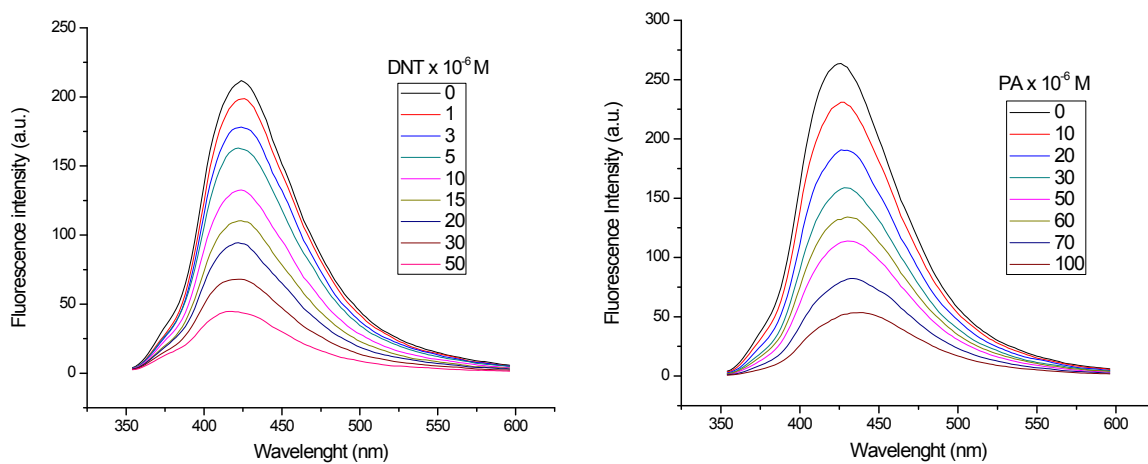

**Fig. S3** Fluorescence responses of ANC to DNT and PA.

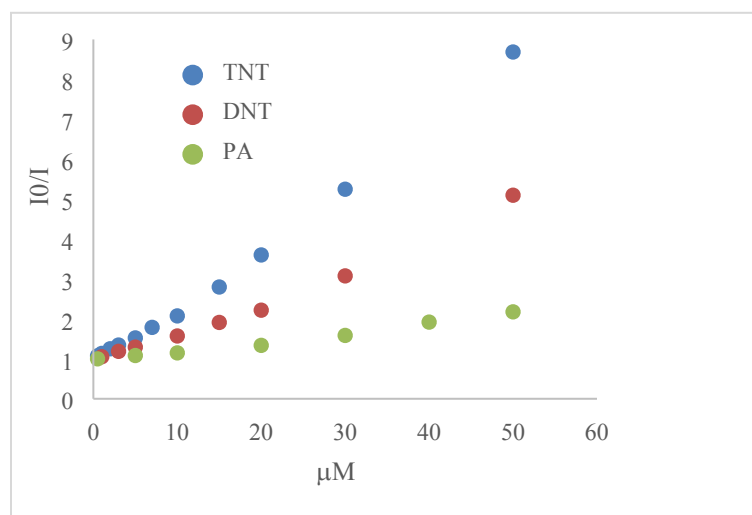

**Fig. S4** Stern-Volmer plots for fluorescence quenching of ANC with TNT, DNT and PA.

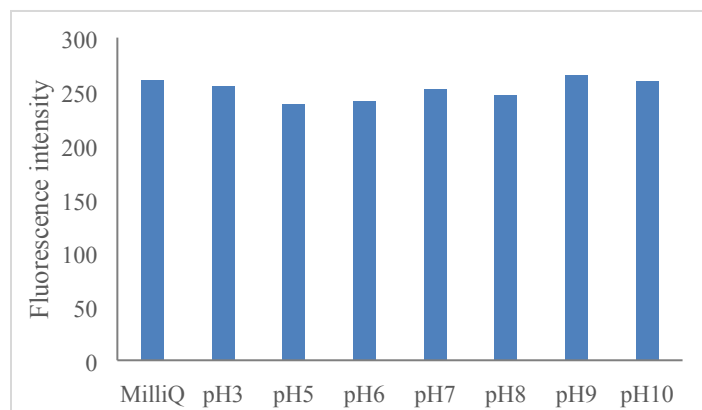

**Fig. S5** Fluorescence intensity of ANC 0.5  $\mu\text{M}$  at  $\lambda_{\text{max}} = 420$  nm in various pH.

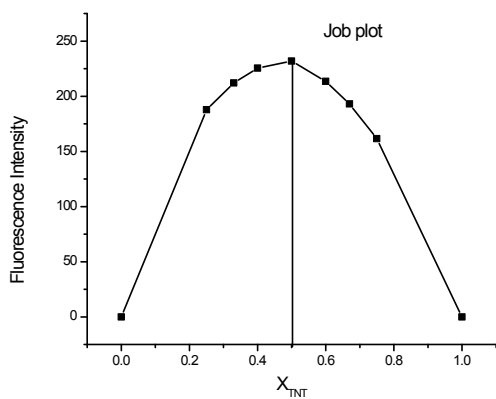

**Fig. S6** Job's plot of fluorescence responses of ANC upon addition of TNT showing 1:1 stoichiometry.

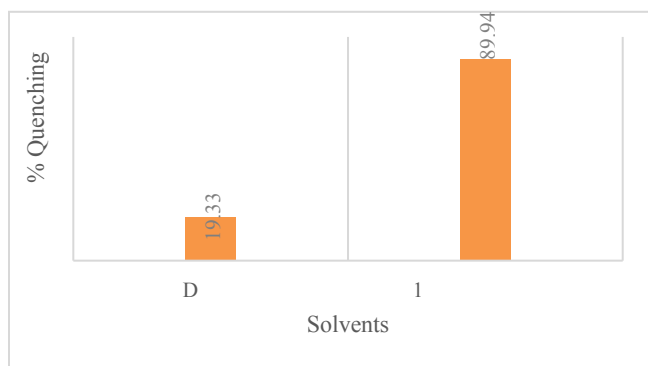

**Fig. S7** Fluorescence quenching of ANC for TNT 100 equiv in DMF and 1%THF/H<sub>2</sub>O.

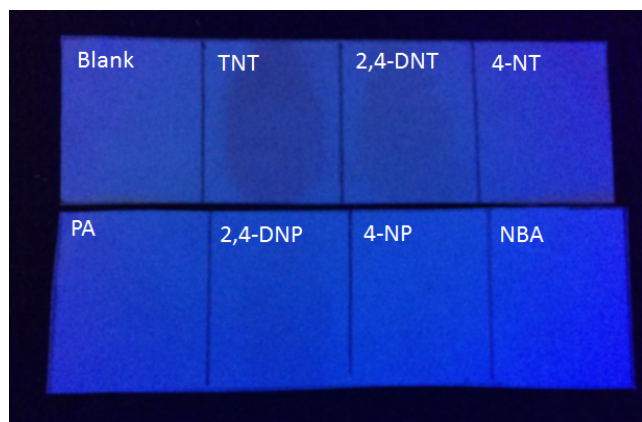

**Fig. S8** Impression of a glove-wearing thumb after rubbing with various nitroaromatic compounds.

**Table S2** Fluorescence quenching effects of TNT and PA found in this work in comparison with previously reported literature works

| TNT                   |                  | PA                    |                  | Media                                                      | References |
|-----------------------|------------------|-----------------------|------------------|------------------------------------------------------------|------------|
| $K_{sv}$ ( $M^{-1}$ ) | %Q at 10 $\mu$ M | $K_{sv}$ ( $M^{-1}$ ) | %Q at 10 $\mu$ M |                                                            |            |
| $3.65 \times 10^4$    | -                | $4.5 \times 10^2$     | -                | Film in aqueous                                            | <i>b</i>   |
| $1.2 \times 10^5$     | -                | $1.8 \times 10^3$     | -                | Film in aqueous                                            | <i>c</i>   |
| $1.33 \times 10^6$    | 94%              | -                     | 20%              | AIE in 20%THF/H <sub>2</sub> O                             | <i>d</i>   |
| $1.45 \times 10^5$    | -                | $1.2 \times 10^4$     | -                | Film in aqueous                                            | <i>e</i>   |
| $1.37 \times 10^5$    | -                | -                     | -                | AIE 5% THF/H <sub>2</sub> O                                | <i>f</i>   |
| $9.48 \times 10^4$    | -                | $1.84 \times 10^4$    | -                | Fe <sub>3</sub> O <sub>4</sub> @Tb-BTC nanospheres in EtOH | <i>g</i>   |
| -                     | 95%              | -                     | 55%              | Film in aqueous                                            | <i>h</i>   |
| $1.09 \times 10^5$    | 52%              | $2.1 \times 10^4$     | 13%              | in aqueous                                                 | This work  |

(b) He, G.; Yan, N.; Yang, J.; Wang, H.; Ding, L.; Yin, S.; Fang, Y. *Macromolecules*, **2011**, *44*, 4759.

(c) Xu, B.; Wu, X.; Li, H.; Tong, H.; Wang, L.; *Macromolecules*, **2011**, *44*, 5089.

(d) Kumar, M.; Vij, V.; Bhalla, V. *Langmuir*, **2012**, *28*, 12417.

(e) Jagtap, S. B.; Potphode, D. D.; Ghorpade, T. K.; Palai, A. K.; Patri, M.; Mishra, S. P. *Polymer*, **2014**, *55*, 2792.

(f) Feng, H. T.; Wang, J. H.; Zheng, Y. S. *ACS Appl. Mater. Interfaces*, dx.doi.org/10.1021/am505636f

(g) Qian, J. J.; Qiu, L. G.; Wang, Y. M.; Yuan, Y. P.; Xie, A. J.; Shen, Y. H. *Dalton Trans.*, **2014**, *43*, 3978.

(h) Kartha, K. K.; Sandeep, A.; Nair, V. C.; Takeuchi, M.; Ajayaghosh, A. *Phys. Chem. Chem. Phys.*, **2014**, *16*, 18896.

### $^1\text{H}$ -NMR (400 MHz) of **2a** in $\text{CDCl}_3$

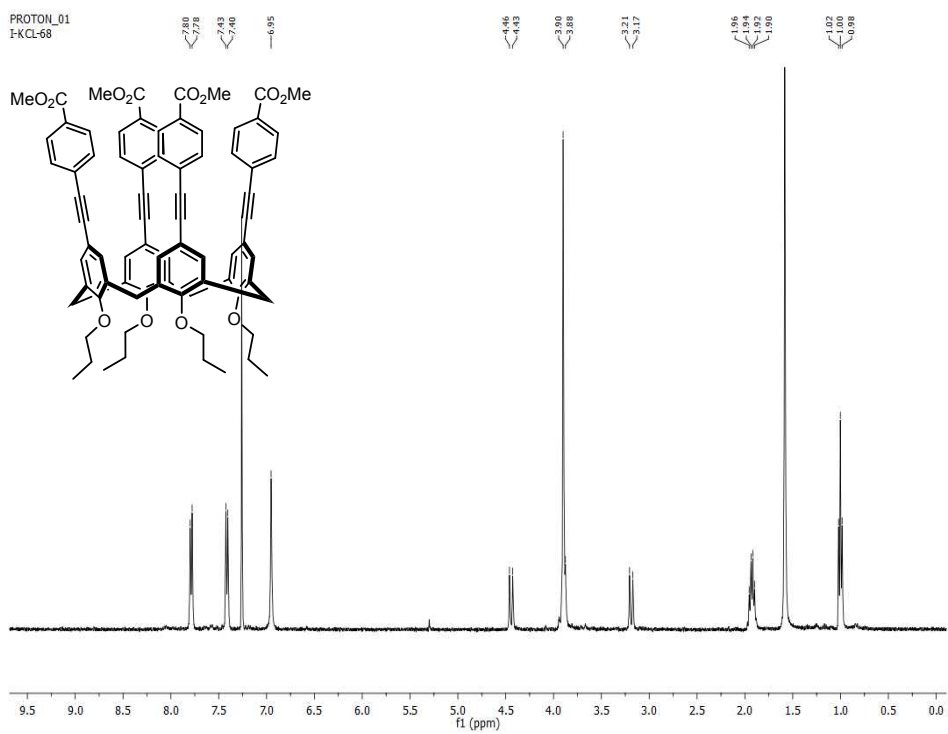

### $^{13}\text{C}$ -NMR (100 MHz) of **2a** in $\text{CDCl}_3$

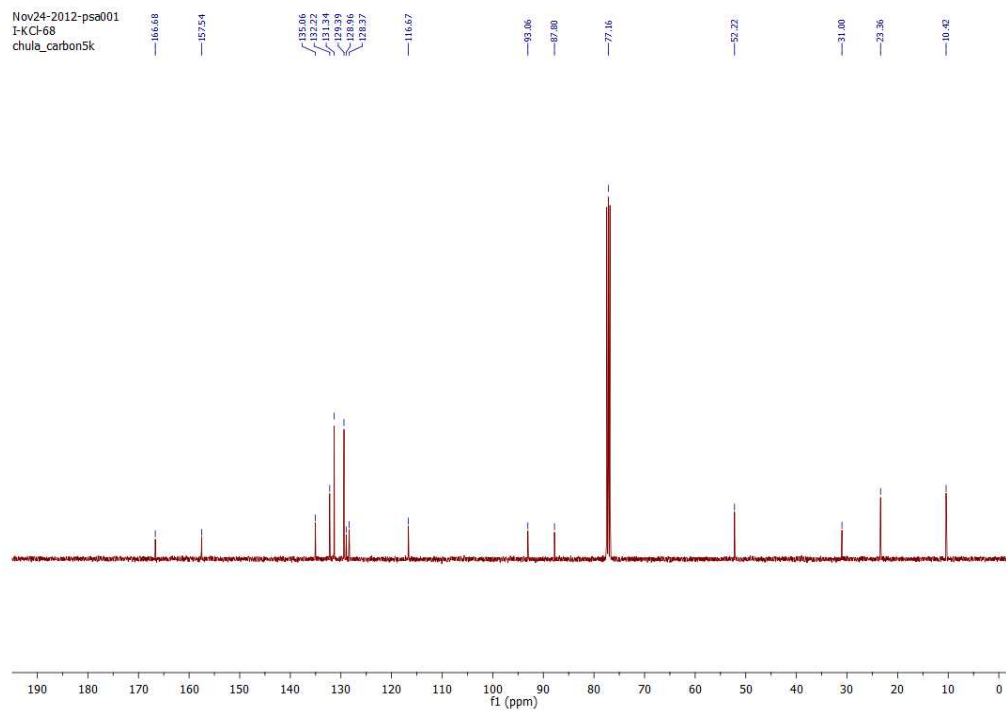

# $^1\text{H}$ -NMR (400 MHz) of **2b** in $\text{CDCl}_3$

Sep08-2011-dh001  
I-KCL-60  
chula\_proton hmbc

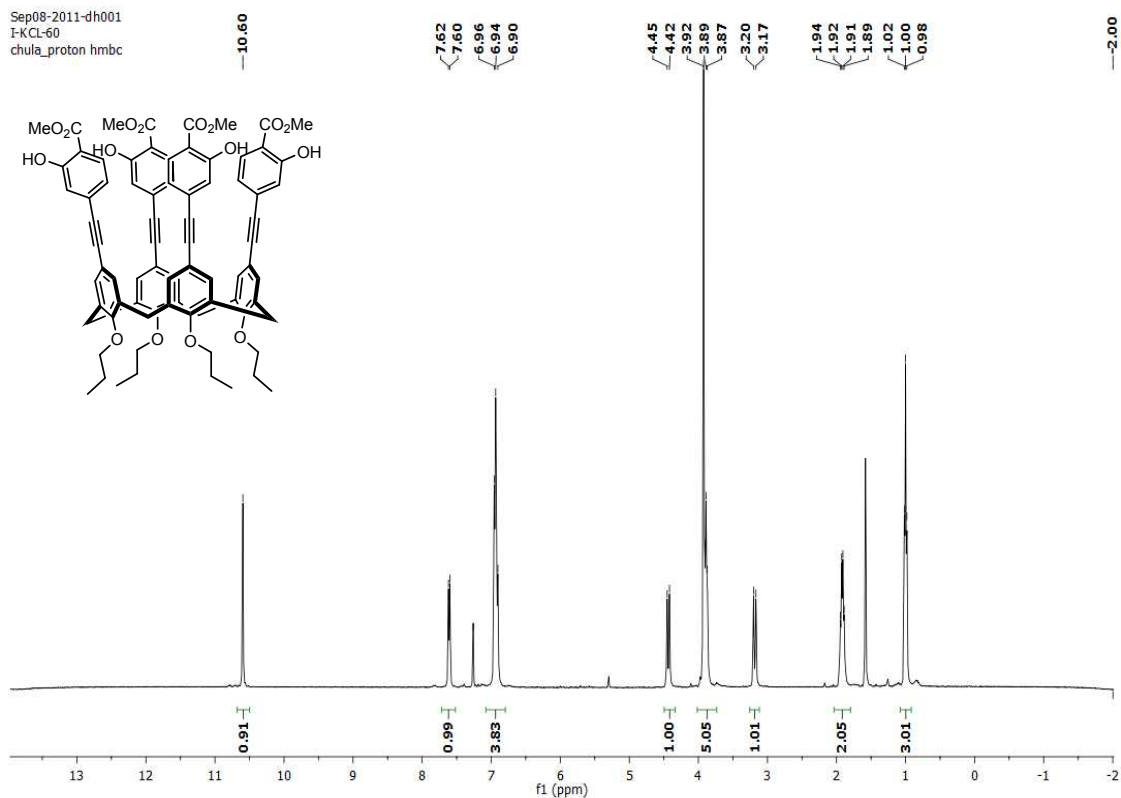

# $^{13}\text{C}$ -NMR (100 MHz) of **2b** in $\text{CDCl}_3$

Sep08-2011-dh001  
I-KCL-60  
chula\_carbon1k hmbc

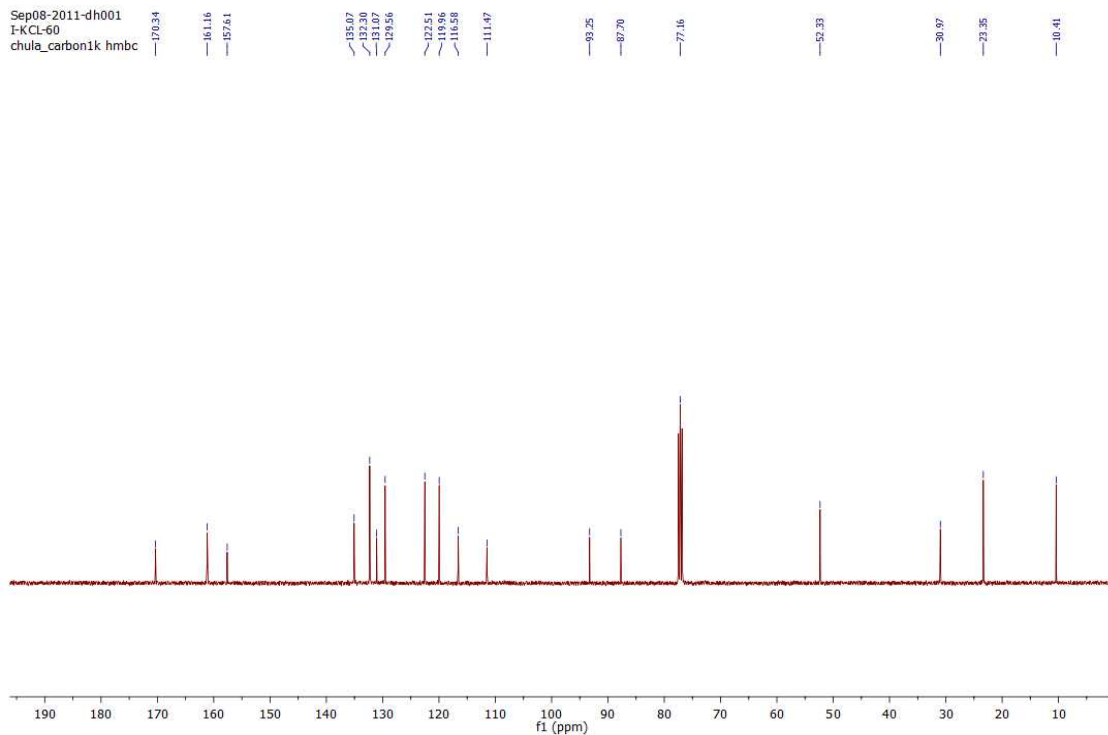



# $^1\text{H}$ -NMR (400 MHz) of ANC in $\text{CDCl}_3$

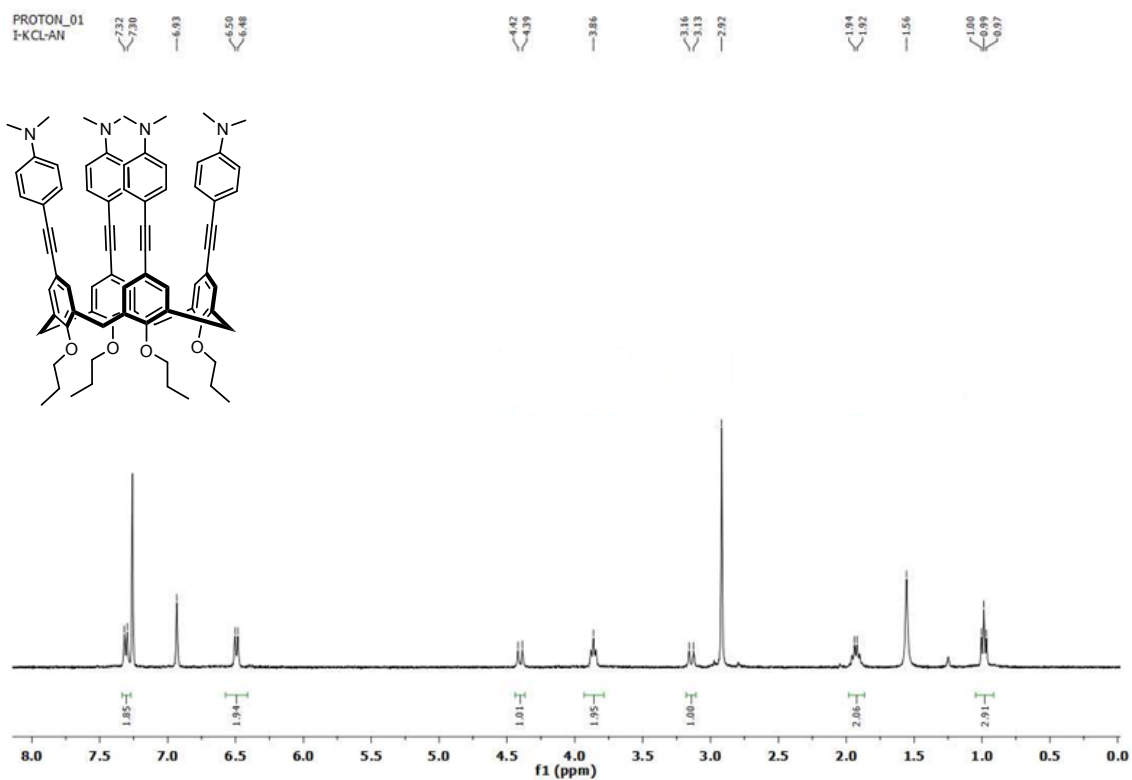

# $^{13}\text{C}$ -NMR (100 MHz) of ANC in $\text{CDCl}_3$

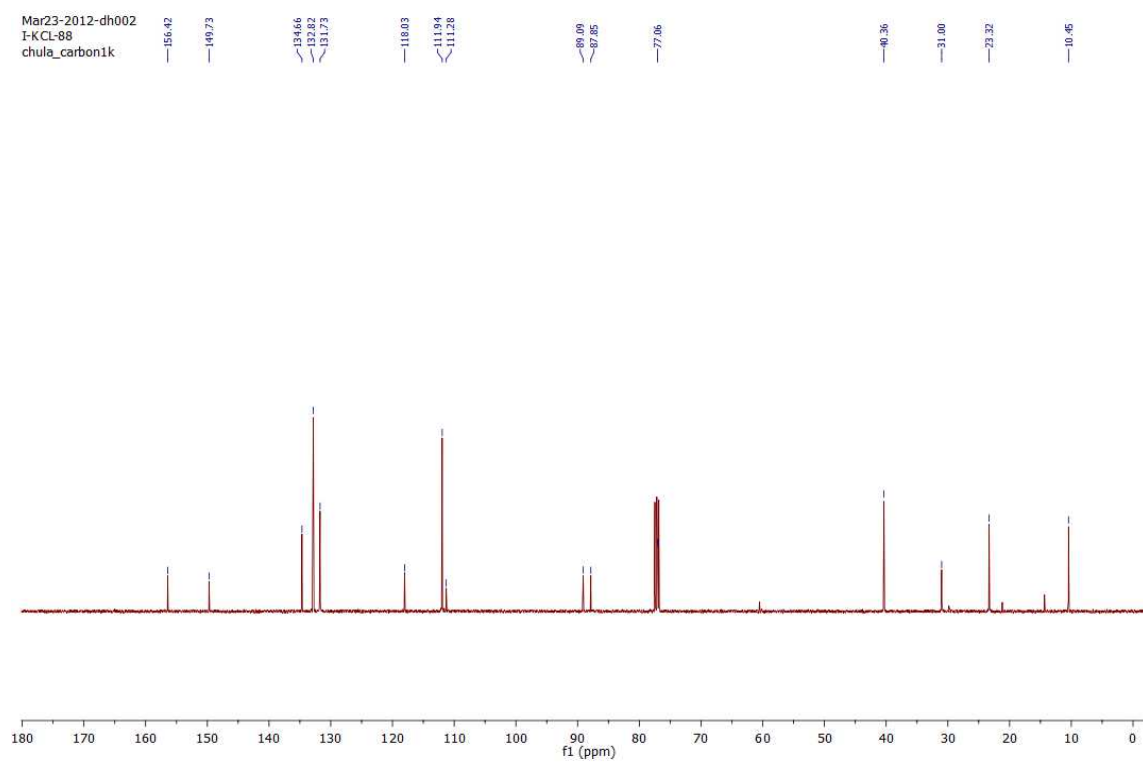

# H<sup>1</sup>-NMR (400 MHz) of **BAC** in Acetone-d<sub>6</sub>

PROTON\_01  
T-BAC in acetone

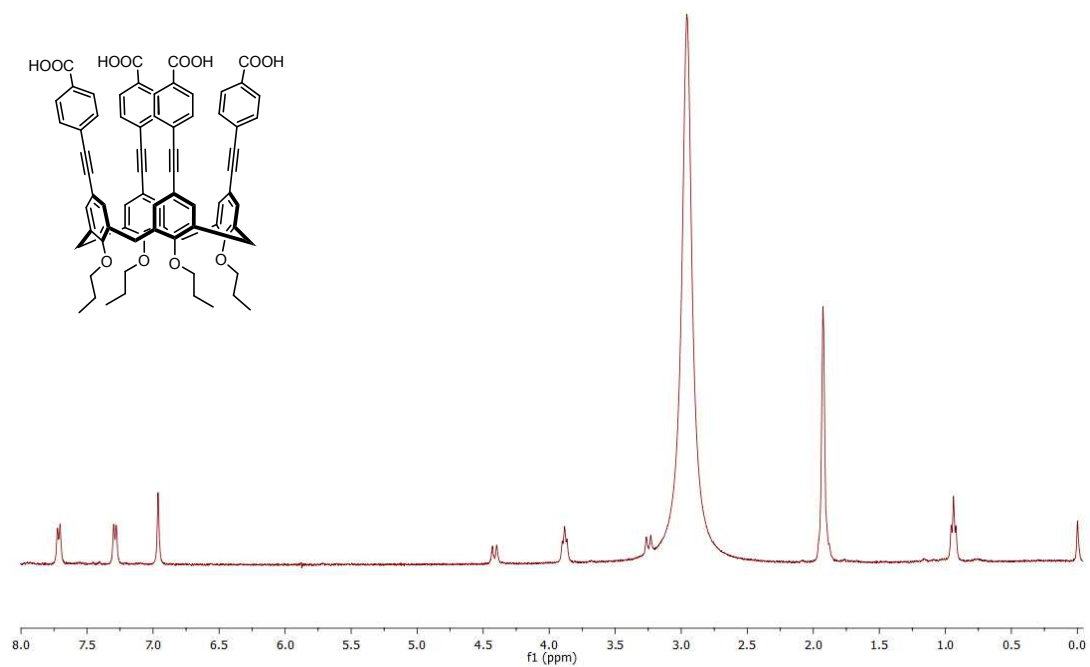

# C<sup>13</sup>-NMR (100 MHz) of **BAC** in Acetone-d<sub>6</sub>

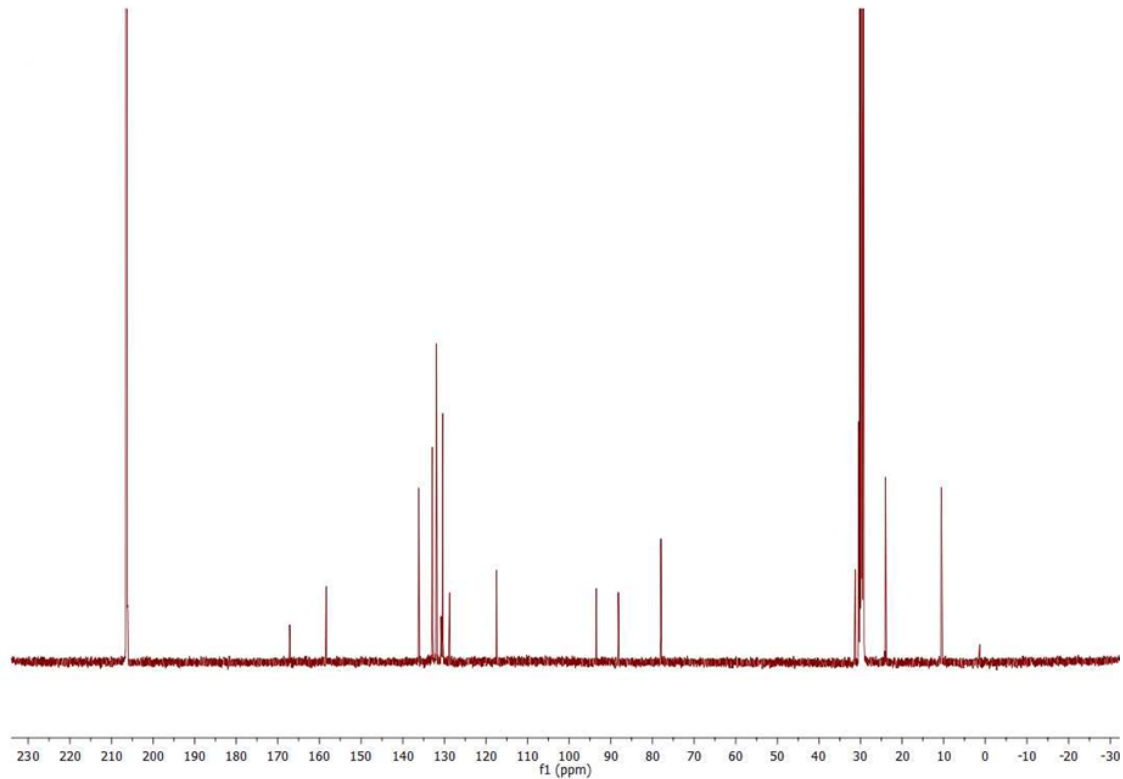

# $^1\text{H}$ -NMR (400 MHz) of SAC in Metanol-d4

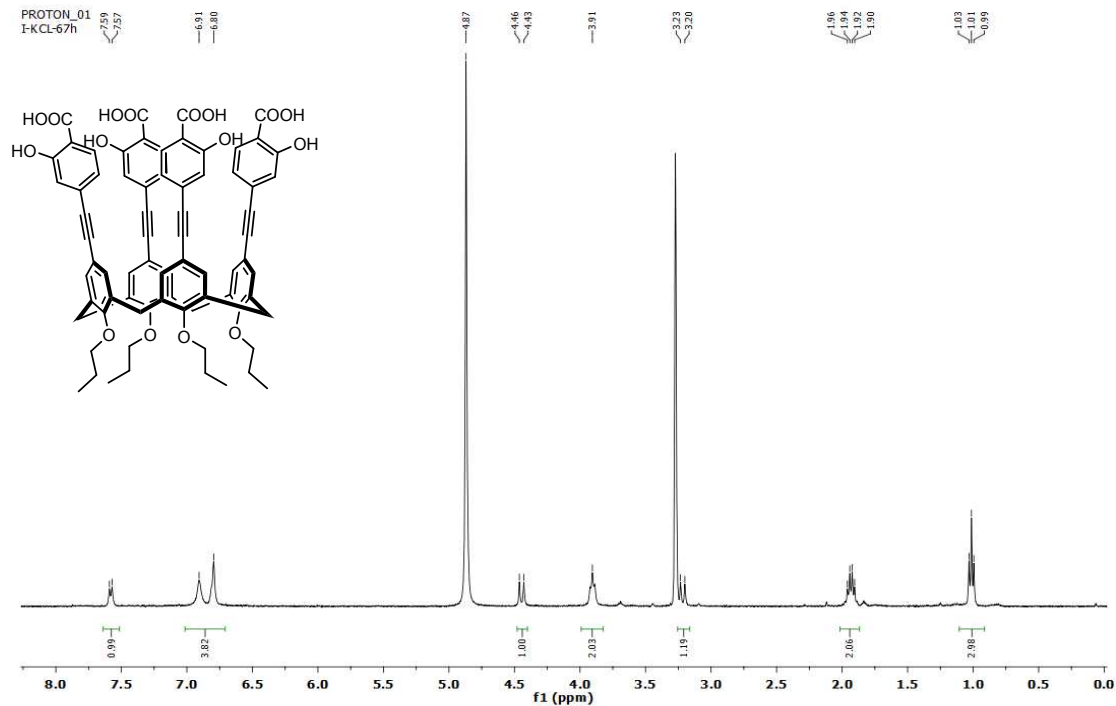

# $^{13}\text{C}$ -NMR (100 MHz) of SAC in Metanol-d4

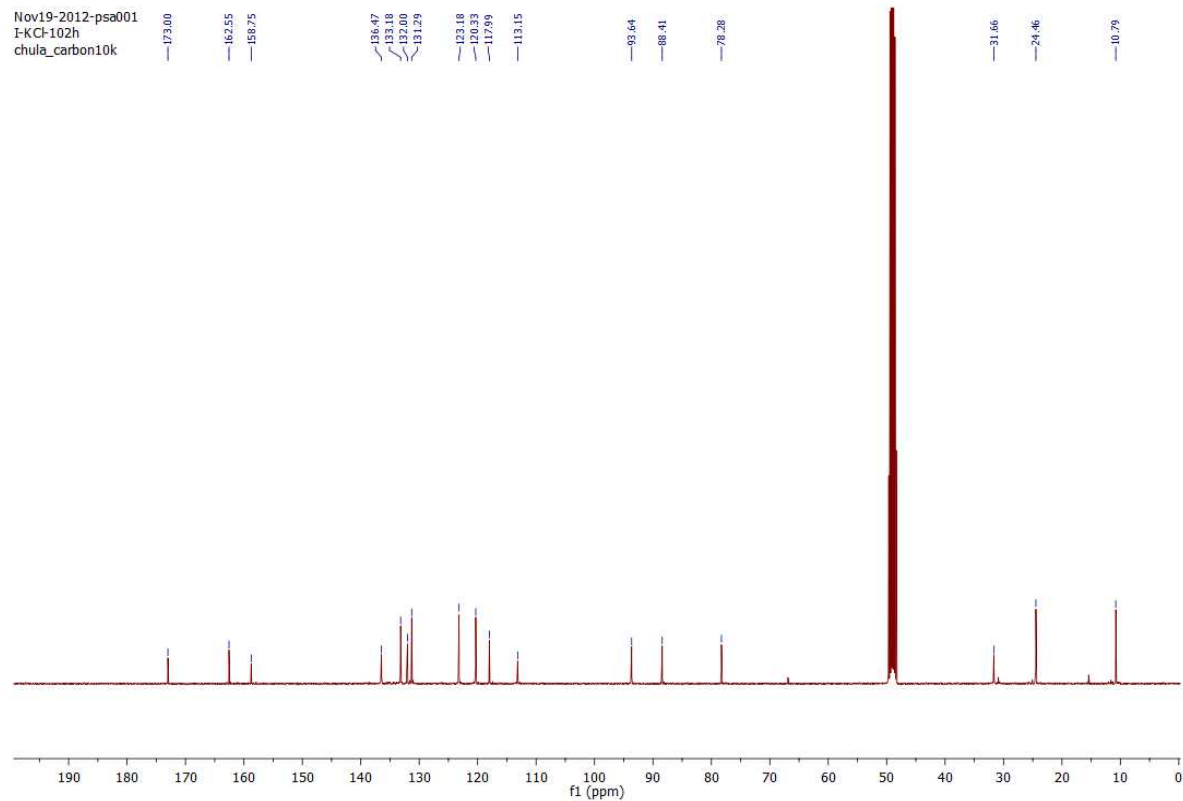

Supplement: c5ra02758f1.pdf [file c5ra02758f1.pdf]
